# Supplementary material for: Effects of Environmental Stresses (Heat, Salt, Waterlogging) on Grain Yield and Associated Traits of Wheat under Application of Sulfur-Coated Urea
Source: MDPI journal article supplement (doi:10.3390/agronomy11112340), 2021-11-19
Supplement: s1 [file s1]

**Table S1.** Photosynthetic attributes of the wheat plant grown under different stress conditions (Flowering Stage (FS) / Flag Leaf).

| <b>Florescence</b>        |                                                                                                                                     | <b>F<sub>v</sub>/F<sub>m</sub></b> |
|---------------------------|-------------------------------------------------------------------------------------------------------------------------------------|------------------------------------|
| <b>(Treatment Date)</b>   | <b>(4/15/2021)</b>                                                                                                                  | <b>(4/22/2021)</b>                 |
| Control                   | 0.794 ± 0.01                                                                                                                        | 0.823 ± 0.04                       |
| Waterlogging              | 0.785 ± 0.08                                                                                                                        | 0.790 ± 0.05                       |
| Salt Stress               | 0.814 ± 0.03                                                                                                                        | 0.809 ± 0.08                       |
| Combine Stress (WL + SS)  | 0.789 ± 0.04                                                                                                                        | 0.794 ± 0.09                       |
| <b>Photo</b>              | <b>Photosynthetic rate (μmol CO<sub>2</sub> m<sup>-2</sup> s<sup>-1</sup>)</b>                                                      |                                    |
| Control                   | 14.583 ± 1.3                                                                                                                        | 15.659 ± 1.1                       |
| Waterlogging              | 15.386 ± 1.1                                                                                                                        | 16.522 ± 2.01                      |
| Salt Stress               | 16.340 ± 1.2                                                                                                                        | 17.546 ± 1.3                       |
| Combined Stress (WL + SS) | 14.666 ± 1.3                                                                                                                        | 15.748 ± 1.2                       |
| <b>Cond</b>               | <b>Stomatal Conductance to H<sub>2</sub>O (mol H<sub>2</sub>O m<sup>-2</sup> s<sup>-1</sup>)</b>                                    |                                    |
| Control                   | 0.203 ± 0.01                                                                                                                        | 0.232 ± 0.02                       |
| Waterlogging              | 0.186 ± 0.01                                                                                                                        | 0.212 ± 0.01                       |
| Salt Stress               | 0.180 ± 0.01                                                                                                                        | 0.206 ± 0.01                       |
| Combined Stress (WL + SS) | 0.162 ± 0.02                                                                                                                        | 0.185 ± 0.02                       |
| <b>Ci</b>                 | <b>Intercellular CO<sub>2</sub> concentration (μmol CO<sub>2</sub> mol<sup>-1</sup>)</b>                                            |                                    |
| Control                   | 262.726 ± 5.9                                                                                                                       | 272.731 ± 4.5                      |
| Waterlogging              | 252.440 ± 2.9                                                                                                                       | 262.053 ± 3.2                      |
| Salt Stress               | 237.549 ± 3.7                                                                                                                       | 246.595 ± 3.4                      |
| Combined Stress (WL + SS) | 238.138 ± 4.3                                                                                                                       | 247.206 ± 6.2                      |
| <b>Trmmol</b>             | <b>Transpiration rate (mmol H<sub>2</sub>O m<sup>-2</sup> s<sup>-1</sup>)</b>                                                       |                                    |
| Control                   | 3.554 ± 0.1                                                                                                                         | 3.588 ± 0.1                        |
| Waterlogging              | 3.303 ± 0.2                                                                                                                         | 3.334 ± 0.2                        |
| Salt Stress               | 3.232 ± 0.2                                                                                                                         | 3.263 ± 0.1                        |
| Combined Stress (WL + SS) | 2.900 ± 0.1                                                                                                                         | 2.927 ± 0.3                        |
| <b>WUE</b>                | <b>Water Use Efficiency (μmol CO<sub>2</sub> m<sup>-2</sup> s<sup>-1</sup> / mmol H<sub>2</sub>O m<sup>-2</sup> s<sup>-1</sup>)</b> |                                    |
| Control                   | 4.103 ± 0.1                                                                                                                         | 4.364 ± 0.1                        |
| Waterlogging              | 4.658 ± 0.1                                                                                                                         | 4.955 ± 0.2                        |
| Salt Stress               | 5.055 ± 0.2                                                                                                                         | 5.377 ± 0.3                        |
| Combined Stress (WL + SS) | 5.057 ± 0.3                                                                                                                         | 5.380 ± 0.2                        |

Reported values are the mean of triplicates and standard deviation where n=3.

**Table S2.** Properties of the soil used in the study.

| Soil Texture                                         | Sandy Clay-Loam |
|------------------------------------------------------|-----------------|
| Sand (%)                                             | 55.9            |
| Silt (%)                                             | 19.9            |
| Clay (%)                                             | 24.2            |
| CaCO <sub>3</sub> (%)                                | 7.21            |
| pH                                                   | 7.75            |
| EC (dS m <sup>-1</sup> )                             | 1.57            |
| Organic matter (%)                                   | 0.31            |
| Total N (%)                                          | 0.021           |
| K <sub>2</sub> O (kg da <sup>-1</sup> )              | 70.70           |
| P <sub>2</sub> O <sub>5</sub> (kg da <sup>-1</sup> ) | 3.85            |
| Ca (mg kg <sup>-1</sup> )                            | 21.88           |
